# Supplementary material for: People Believe and Behave as if Consumers of Natural Foods Are Especially Virtuous
Source: Front Psychol. 2018 Sep 27;9:1823. doi: 10.3389/fpsyg.2018.01823 (PMC6170642; doi:10.3389/fpsyg.2018.01823)
Supplement: Supplementary file 2 [file Table_2.XLSX]

## Sheet: Experiment Full Data
	Trust game data (1 = natural group, 2 = unnatural group)																Ratings about other participant (1st set)																									Ratings about other participant after pointing out their food (2nd set)
Participant	Group	R1Sent	R1ExpectedReturn	R1Confidence	R2Sent	R2ExpectedReturn	R2Confidence	R3Sent	R3ExpectedReturn	R3Confidence	R4Sent	R4ExpectedReturn	R4Confidence	Age	Sex	Diet	@1TolerantofOthers	@1SexuallyMonogamous	@1Considerate	@1PrefersFamiliarity	@1HighAspirations	@1HardWorking	@1Virtuous	@1Practical	@1Methodical	@1FollowsNorms	@1Talkative	@1HealthConscious	@1Attractive	@1Masculine	@1Healthy	@1Likeable	@1Wealthy	@1Educated	@1Fat	@1Active	@1Intelligent	@1Old	@1Pure	@1Disciplined	@1PlansAhead	@2TolerantofOthers	@2SexuallyMonogamous	@2Considerate	@2PrefersFamiliarity	@2HighAspirations	@2HardWorking	@2Virtuous	@2Practical
1	1	5	10	1	5	5	1	6	6	1	9	9	1	22	2	Omnivorous	3	3	4	1	3	4	3	4	4	4	4	5	3	4	5	4	3	5	3	4	3	3	5	4	4	4	3	4	4	4	3	4	5
2	1	5	3	0	7	7	0	9	10	0	9	10	0	33	1	Omnivorous	4	5	5	4	5	4	5	5	4	2	2	5	4	2	4	5	4	5	2	4	4	2	5	5	4	4	3	3	2	4	4	3	3
3	1	5	5	-2	7	7	1	10	10	2	2	2	2	34	1	Omnivorous	5	4	4	5	3	2	4	5	4	5	1	3	4	2	4	5	2	5	2	3	4	4	4	5	5	5	4	5	1	4	4	4	1
4	2	6	18	1	5	5	0	5	5	1	5	5	2	18	1	Omnivorous	3	3	4	5	4	3	4	2	5	5	2	3	3	4	3	5	3	4	2	4	4	2	3	4	5	4	3	3	4	2	2	3	3
5	2	2	4	0	4	2	0	3	4	0	5	3	0	18	1	Omnivorous	4	3	4	4	3	4	5	3	5	4	3	3	3	2	3	4	3	5	3	3	5	3	4	4	4	3	3	4	2	3	2	3	4
6	1	7	7	1	7	7	1	7	7	1	7	7	1	30	2	Omnivorous	4	3	4	4	4	4	4	4	3	4	3	3	3	3	3	4	3	4	3	3	4	3	4	4	4	4	3	4	4	4	4	4	4
7	2	3	4	0	4	4	1	5	5	2	1	1	1	19	1	Omnivorous	4	3	2	3	5	2	4	5	5	5	2	2	3	2	2	4	5	4	3	4	4	1	2	4	4	4	3	3	4	2	1	3	4
8	1	4	4	0	5	5	1	7	7	2	6	5	1	19	1	Omnivorous	4	4	5	2	5	5	5	4	4	4	3	4	3	2	4	4	3	5	3	4	5	2	3	5	5	4	3	4	5	5	5	5	4
9	2	4	4	1	2	2	1	5	5	2	1	1	2	19	2	Omnivorous	3	3	3	5	3	2	3	3	5	5	3	3	3	3	3	2	1	3	3	3	3	2	3	3	4	3	3	4	5	2	2	3	3
10	1	4	6	0	5	3	0	2	2	1	9	1	2	19	1	Omnivorous	4	3	4	4	3	3	4	3	5	4	1	3	3	3	3	4	4	4	3	3	4	3	3	4	5	4	3	4	2	3	3	4	4
11	1	5	2	-1	4	4	0	8	8	2	10	10	-2	18	1	Omnivorous	3	3	4	5	4	3	3	5	4	5	2	3	3	4	3	4	3	4	3	3	4	4	2	3	5	4	3	4	4	5	4	4	4
12	2	5	7	0	5	5	1	5	5	1	5	5	0	18	1	Omnivorous	5	3	5	5	3	3	5	5	5	5	3	3	3	3	3	3	3	3	3	3	3	3	3	3	4	3	3	3	3	3	2	3	3
13	2	4	3	-1	5	5	0	4	3	1	10	15	2	18	2	Omnivorous	4	3	4	4	3	3	4	2	4	5	3	2	3	3	2	4	2	3	3	3	4	2	3	4	3	3	3	4	5	2	2	4	4
14	2	3	3	1	5	10	1	2	4	1	7	14	-1	18	1	Omnivorous	5	2	5	5	4	4	5	1	5	5	2	3	5	3	3	5	3	4	3	3	5	3	5	5	2	5	5	4	1	3	4	4	3
15	2	6	0	0	10	0	0	10	7	1	10	10	2	22	2	Omnivorous	3	3	3	5	5	3	3	5	5	3	3	3	3	5	3	3	3	3	3	3	4	1	3	3	3	3	3	3	5	1	1	3	3
16	1	10	0	1	10	10	1	5	5	1	10	0	1	19	2	Omnivorous	2	4	4	4	2	1	4	4	5	5	2	3	3	3	4	2	4	5	3	3	2	1	3	2	1	2	4	4	2	2	1	4	4
17	1	4	2	0	3	4	0	8	4	1	2	2	2	18	1	Omnivorous	3	3	2	5	3	2	3	2	4	4	3	3	3	3	3	3	3	3	3	2	3	3	3	3	5	5	3	5	3	5	4	5	5
18	1	3	5	1	5	4	1	6	5	1	10	5	2	19	2	Omnivorous	3	2	5	2	4	3	4	5	3	1	3	5	3	5	5	4	5	5	2	5	4	1	4	4	5	4	3	5	1	5	4	4	4
19	2	8	12	0	10	15	1	10	10	1	1	0	2	19	1	Omnivorous	4	3	4	5	3	3	3	4	4	4	3	3	3	3	3	3	3	4	3	3	4	3	3	4	4	3	3	3	3	3	2	3	4
20	1	4	4	0	5	7	0	5	5	1	5	5	1	20	2	Omnivorous	3	3	4	3	4	3	4	4	3	4	3	3	3	3	3	4	3	4	3	3	4	3	3	4	4	3	3	4	4	4	4	3	3
21	2	8	12	1	10	12	0	3	3	1	0	0	2	20	2	Omnivorous	4	3	2	5	2	2	3	4	5	4	2	2	3	4	3	2	4	4	2	2	4	2	4	4	4	2	2	2	3	1	1	2	3
22	2	3	3	-1	6	2	0	1	2	1	1	1	1	19	1	Omnivorous	3	3	3	5	4	3	2	4	5	4	3	3	3	3	3	3	3	4	3	3	4	2	3	4	4	2	3	2	5	3	2	3	4
23	1	3	4	0	5	5	-1	2	1	1	8	10	0	18	1	Omnivorous	4	3	1	3	3	4	2	3	2	1	2	3	3	3	3	2	1	3	3	3	4	2	3	3	1	2	3	4	3	1	5	4	5
24	2	7	10	1	8	10	0	9	9	2	4	4	1	18	2	Omnivorous	4	3	4	5	3	3	4	4	5	4	3	3	4	3	4	4	5	4	3	3	4	2	3	4	2	4	2	4	4	3	2	3	4
25	2	5	3	0	5	4	1	6	6	1	3	3	1	21	2	Omnivorous	4	2	4	2	4	4	4	4	4	4	3	4	3	3	3	4	4	4	3	3	4	3	3	3	4	4	2	4	4	3	2	2	4
26	1	10	15	0	8	8	1	1	1	2	0	0	2	19	1	Omnivorous	3	3	1	5	5	1	1	5	5	5	3	3	3	5	3	1	5	3	3	3	1	1	3	3	1	3	3	5	1	5	5	3	5
27	1	10	5	0	10	10	0	10	10	1	10	10	2	19	1	Omnivorous	5	4	5	4	4	3	5	4	4	3	4	4	3	3	4	5	4	5	3	4	4	3	4	4	4	4	4	4	5	5	5	4	4
28	2	5	7	1	4	5	1	5	5	1	3	3	1	20	1	Omnivorous	4	3	4	4	3	2	3	4	4	4	2	3	3	4	4	4	3	4	3	3	4	2	3	4	4	4	4	4	4	4	2	4	4
29	1	5	10	1	10	20	1	0	0	2	1	2	1	20	2	Omnivorous	4	2	4	2	5	5	4	5	1	4	3	4	4	2	4	5	4	4	2	4	5	2	3	4	4	4	3	4	4	4	4	4	5
30	1	8	20	0	5	10	-1	7	10	-1	8	8	1	21	1	Omnivorous	4	3	4	5	3	3	3	2	3	3	3	3	3	3	3	3	3	3	3	3	4	3	3	3	4	2	3	3	5	3	4	4	4
31	2	5	5	1	4	4	1	1	1	1	0	0	2	21	2	Omnivorous	1	3	1	4	3	3	1	1	3	3	3	3	3	4	2	2	3	3	2	1	3	2	1	1	3	1	3	1	1	1	1	1	3
32	2	4	6	-1	6	6	0	3	4	0	2	2	1	18	1	Omnivorous	3	3	4	4	3	3	4	4	4	3	3	3	3	3	3	4	3	4	3	3	4	3	3	4	4	3	3	3	4	2	3	3	3
33	2	4	6	0	3	3	0	2	2	1	1	1	1	18	1	Omnivorous	3	3	4	2	3	2	4	3	3	3	2	3	3	2	2	3	3	3	2	3	3	2	2	3	2	4	3	3	2	3	3	3	4
34	1	3	3	1	4	4	0	4	4	1	3	3	2	20	1	Omnivorous	4	3	4	4	3	3	4	4	4	4	3	3	3	3	3	4	3	4	3	3	4	3	3	3	4	4	3	4	3	4	4	3	4
35	1	4	4	0	5	7	0	3	3	1	8	8	1	18	1	Omnivorous	3	3	2	2	5	3	2	5	5	5	3	5	3	3	5	2	4	4	1	5	5	3	3	5	5	3	3	3	5	5	5	4	4
36	2	2	2	0	3	2	1	4	4	1	4	4	1	19	1	Omnivorous	4	3	4	2	3	3	4	4	2	2	4	3	3	4	3	4	3	4	2	3	4	2	4	4	4	4	3	4	2	4	2	4	3
37	1	4	6	0	3	3	1	0	0	1	9	9	1	19	1	Omnivorous	4	3	4	2	5	4	2	5	5	4	3	4	3	3	3	2	4	5	3	4	4	3	2	5	5	4	3	4	2	4	5	4	5
38	2	10	5	1	10	10	1	0	0	2	0	0	2	20	2	Omnivorous	4	3	2	5	3	2	3	2	3	5	5	3	3	2	2	3	3	3	3	2	3	2	2	1	2	4	2	3	4	2	2	3	2
39	2	10	15	1	10	12	0	5	5	1	2	0	2	18	2	Omnivorous	3	3	2	4	4	3	2	4	3	2	3	3	3	3	3	3	3	3	3	3	4	3	3	4	4	3	3	3	3	3	3	3	3
40	1	6	6	0	7	7	1	7	7	1	9	9	1	21	1	Omnivorous	4	3	4	3	3	3	4	3	4	3	3	3	3	3	3	3	3	3	3	3	3	3	3	3	3	3	3	3	3	3	4	3	3
[truncated: 24 more columns]
